# Supplementary material for: High-resolution melting (HRM) curve analysis as a potential tool for the identification of earthworm species and haplotypes
Source: PeerJ journal article supplement (doi:10.7717/peerj.13661), 2022-06-28

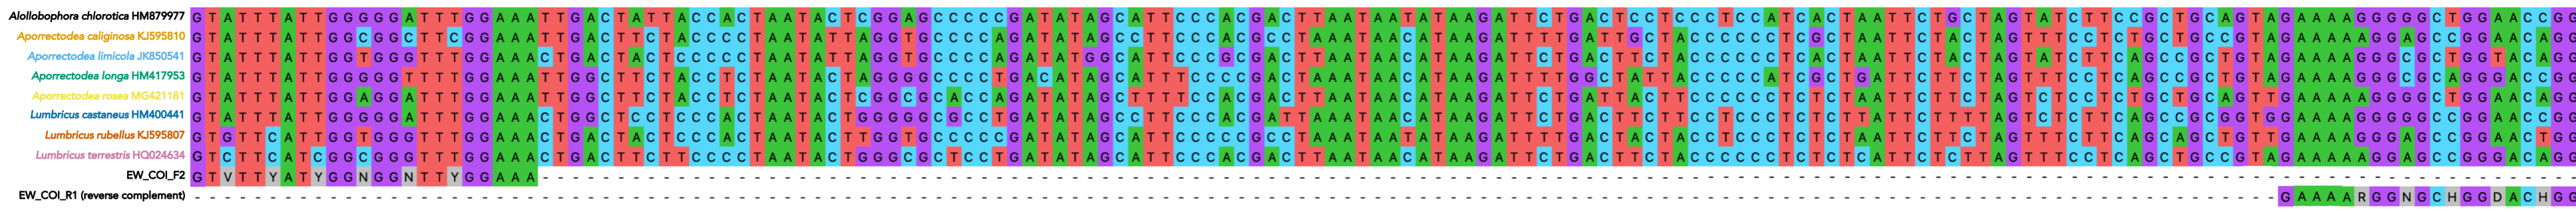

Supplement: Figure_S1_R2.pdf [file Figure_S1_R2.pdf]
