# Supplementary material for: High-resolution melting (HRM) curve analysis as a potential tool for the identification of earthworm species and haplotypes
Source: PeerJ journal article supplement (doi:10.7717/peerj.13661), 2022-06-28
Supplement: R1_PeerJ_Figure_S2.pdf [file R1_PeerJ_Figure_S2.pdf]

*Alolobophora chlorotica* HM879977 A T A G T A G G T G C C G G T A T A A G A C T T C T T A T T C G A A T C G A A C T A A G A C A G C C G G G A G C C T C C T A G G C A G A G A C C A A C T C T A C A A T C A A T C G T T A C A G C C C A C G C A T T C G T A A T A A T T T T C T T C T A G T T  
*Aporrectodea caliginosa* KJ595810 A T A G T A G G A G C C G G T A T A A G A C T C C T A A T T C G A A T C G A A C T A A G A C A G C C G G G A G C A T T T T C T A G G A A G A G A T C A A C T C T A T A A T A C T A T T G T A A C T G C C T C A T G C A T T T G T A A T A A T C T T C T T T C T A G T A  
*Aporrectodea limicola* JN850541 A T A G T G G T G C T G G A T A A A G A C C T T C T T A T T C G A A T C G A G C T A A G A C A A C C T G G A G C T T C C T A G G A G A G A T C A A C T A T A C A A T T G T G A C A G C C C A C G C A T T T G T A A T A A T T T T C T T C T T G T A  
*Aporrectodea longa* HM417953 A T G G T T G G T G C C G G T A T A A G A C T C C T T A T T C G A A T T G A G C T A A G A C A A C C G G G A G C T T T C C T A G G A A G A G A T C A A C T C T A C A A T T G T T A C A G C T C A C G C A T T C G T A A T A A T T T T C T T T T A G T T  
*Aporrectodea rosea* MG421181 A T A G T A G G G G C C G G A T A A G C C T C C T T A T T C G A A T C G A A T A A G A C A A C C T G G G G C A T T C C T T G G C A G A G A T C A A T T G T A T A A T A C A A T T G T T A C A T T G C C A T G C A T T C G T A A T A A T C T T C T T C C T A G T A  
*Lumbricus castaneus* HM400441 A T A G T G G G G C C G G A T A A G C C T T C T A A T T C G A A T T G A A C T A A G G C A A C C A G G T G C A T T T C T A G G A A G A G A C C A G C T A T A T A A C A G A T T G T T A C T G C A C G C A T T T G T A T A A T C T T T T T C T A G T G  
*Lumbricus rubellus* KJ595807 A T A G T T G G A G C C G G A A T A A G A C T T C T C A T C C G A A T C G A A C T A A G G C A A C C A T G G T G C A T T C C T A G G C A G A G A T C A A C T T T A C A A T T G T C A C T G C T C A T G C A T T T G T A T A A T C T T T C T T C T A G T T  
*Lumbricus terrestris* HQ024634 A T G G T A G G A G C C G G A A T A A G A C T T C T T A T C C G T A T T G A G T T A A G A C A A C C T G G T G C A T T C C T A G G C A G T G A C C A A T T A T A T A A T A C A A T C G T T A C T G C G C A C G C A T T T G T A T A A T T T T C T T C T A G T A  
 EW\_COL\_F1 -----CATGCAATTYGTDAATAATYTTCTT-----  
 EW\_COL\_F2 -----  
 EW\_COL\_F3 A T R G T D G G D G C H G G W A T A A G -----  
 EW\_COL\_R1 (reverse complement) -----  
 EW\_COL\_R2 (reverse complement) -----  
 EW\_COL\_R3 (reverse complement) -----

*Alolobophora chlorotica* HM879977 A T G C C A G T A T T T A T T G G C G G C T T C G G A A A T T G A C T T C T A C C C C T A A T A T T A G G T G C C C C A G A T A T A G C C T T C C C A C G C C T A A A T A A C A T A A G A T T T T G A T T G C T A C C C C C T C G C T A A T T C T A C T A G T T T  
*Aporrectodea caliginosa* KJ595810 A T A C C C G T A T T T A T T G G G G G A T T T G G A A A T T G A C T A T T A C C A C T A A T A C T C G G A G C C C C G A T A T A G C A T T C C C A C G A C T T A A T A A T A T A A G A T T C T G A C T C C T C C C T C C A T C A C T A A T T C T G C T A G T A T  
*Aporrectodea limicola* JN850541 A T A C C T G T A T T T A T T G G T G G G T T T G A A A C T G A C T A C T C C C C C T A A T A T T A G G T G C C C C A G A T A T G G C A T T C C C G C G A C T T A A T A A C A T A A G A T T T C T G A C T T C A C C C C C T C A C T A A T T C T A C T A G T A T  
*Aporrectodea longa* HM417953 A T G C C A G T A T T T A T T G G G G T T T T G A A A T T G C T T C T A C C T A A T A C T A G G G C C C T G A C A T A G C A T T T C C A C G A C T T A A T A A C A T A A G A T T T T G C T T A C T T C C C C C T C T C T A A T T C T T C T A G T C T  
*Aporrectodea rosea* MG421181 A T G C C A G T A T T T A T T G G G G G A T T T G G A A A C T G G C T T C A C C T C A A T A C T C G G G G C A C C A G A T A T A G C T T T T C C A C G A C T T A A T A A C A T A A G A T T C T G A C T T C T T C C T C C C T C T C T A T T C T T T A G T C T  
*Lumbricus castaneus* HM400441 A T G C C A G T A T T T A T T G G G G G A T T T G G A A A C T G G C T C C T C C A C T A A T A C T G G G G G C G C C T G A T A T A G C C T T C C C A C G A T T A A A T A A C A T A A G A T T C T G A C T T C T T C C T C C C T C T C T A T T C T T T A G T C T  
*Lumbricus rubellus* KJ595807 A T A C C C A G T G T T C A T T G G T G G G T T T G G A A A C T G A C T A C T C C C A C T A A T A C T T G G T G C C C G A T A T A G C A T T C C C C G C C T A A A T A A C A T A A G A T T T T G A C T A C T A C C T C C C T C T C T A A T T C T C A G T T  
*Lumbricus terrestris* HQ024634 A T A C C A G T C T T C A T C G G C G G T T T G G A A A C T G A C T T C C C C T A A T A C T T G G T G C C C G A T A T A G C A T T C C C A G A T T C C A G A C T T A A T A A C A T A A G A T T T C T G A C T T C T A C C C C C T C T C T A T T C T C T T A G T T  
 EW\_COL\_F1 -----G T V T T Y A T Y G G N G G N T T Y G G A A A-----  
 EW\_COL\_F2 -----  
 EW\_COL\_F3 -----  
 EW\_COL\_R1 (reverse complement) -----  
 EW\_COL\_R2 (reverse complement) -----T N Y T N C C Y C C H T C N C T N A T T C T-----  
 EW\_COL\_R3 (reverse complement) -----

*Alolobophora chlorotica* HM879977 C C T C T G C T G C C G T A G A A A A G G A G C C G G A A C A G G T T G A A C A G T A T A C C C C C C T A G C C A G A A A T C T T G C A C A T G C T G G A C C C T C A G T A G A T C T A G C T A T T T T T T C A C T A C A C T T A G C T G G A G C T T C  
*Aporrectodea caliginosa* KJ595810 C T T C A G C G C T G C A G T A G A A A A G G G G C T G G A C A C G G A T G A A C T G T T A T C C T C C T C T A G C A A G A A A C C T T G C C C A T G C A G G T C C A T C T G T A G A C C T A G C A C T T C T C T T C A T T T A G C A G G T G C T T C  
*Aporrectodea limicola* JN850541 C T T C A G C G C T G T A G A A A A G G G G C T G T G T A C A G G A T G A A C T G T A T A C C C C C C T A T C A A G A A A T T T A G C C C A T G C A G G G C C A T C T A G T A G A C C T A G C A A T T T T T C C C T T C A T T T A G C G G G G C A T C  
*Aporrectodea longa* HM417953 C C T C A G C G C T G T A G A A A A G G G G C A G G A C C G G C T G A A C A G T A T A T C C C C C C T T A G C T A G A A A C T T A G C T C A C G C G G G C C C T C A G T A G A C C T G G C C A T C T T C T C C C T T C A T C T A G C A G G A G C T C  
*Aporrectodea rosea* MG421181 C C T C A G C G C A G T G A A A A G G G G C T G G A A C A G G T G A A C T G T A T A C C C C C C T C A T A C A A A A T C T G G C C C A T G C A G G A C C C T C G T T G A C C T A G C A C A T T T T C T C A C T A C A C T T G G C A G G A G C A T C  
*Lumbricus castaneus* HM400441 C T T C A G C G C G T G G A A A A G G G G C G G A C C G G T G A A C G T A T A C C C G C T C T A G C T A G A A A T C T A G C T A C G A G G A C C T T C T G T G A C T T G G C A T T T T C T C T T C A T C T G G C G G G G C A T C  
*Lumbricus rubellus* KJ595807 C T T C A G C A G C T G T T G A A A A G G A G C C G G A A C T G G T T G A A C A G T A T A T C C T C C C T T G C A G T A A T C T T G C T C A T G C T G G G C C C T C A G T A G A C C T A G C T A T T T T C T C C T T C A T T T A G C T G G T G C A T C  
*Lumbricus terrestris* HQ024634 C C T C A G C T G C C G T A G A A A A G G A G C C G G A C A G G T G A A C A G T A T A C C C C C T C T T G C A G A A A T C T C G C C A T G C C G G C C A T C T G T A G A T T T A G C T A T T T T T C C C T C C A T T T A G C A G G T G C A T C  
 EW\_COL\_F1 -----  
 EW\_COL\_F2 -----  
 EW\_COL\_F3 -----  
 EW\_COL\_R1 (reverse complement) -----G A A A A R G G N G C H G G D A C H G G-----  
 EW\_COL\_R2 (reverse complement) -----  
 EW\_COL\_R3 (reverse complement) -----T C H Y T H C A Y Y T R G C D G G W G C H T C-----
